# Supplementary material for: Differential expression profiles of long non-coding RNAs as potential biomarkers for the early diagnosis of acute myocardial infarction
Source: PubMed Central journal article supplement (PMC5687631; doi:10.18632/oncotarget.20101), 2017-08-09
Supplement: oncotarget-08-88613-s001.pdf [file oncotarget-08-88613-s001.pdf]

## Differential expression profiles of long non-coding RNAs as potential biomarkers for the early diagnosis of acute myocardial infarction

### SUPPLEMENTARY MATERIALS

**Supplementary Table 1: Overview of differentially expressed lncRNAs between AMI patients and healthy samples**

| Ensembl ID      | Gene Name  | Location                                              | Fold Change | q-value(%) |
|-----------------|------------|-------------------------------------------------------|-------------|------------|
| LOC145474       |            | Chromosome 14: 71,487,861-71,489,714 forward strand   | 2.264       | 0          |
| LOC100129518    |            | Chromosome 6: 159,760,258-159,762,332 reverse strand  | 3.489       | 0          |
| BRE-AS1         |            | Chromosome 2: 27,889,456-27,891,114 reverse strand    | 2.588       | 0          |
| ENSG00000186594 | MIR22HG    | Chromosome 17: 1,711,493-1,717,174 reverse strand.    | 2.59        | 0          |
| ENSG00000251230 | MIR3945HG  | Chromosome 4: 184,844,585-184,855,751 reverse strand  | 3.038       | 0          |
| ENSG00000271614 | ATP2B1-AS1 | Chromosome 12: 89,708,959-89,712,590 forward strand   | 2.539       | 0          |
| ENSG00000225062 | CATIP-AS1  | Chromosome 2: 218,366,665-218,367,835 reverse strand. | 2.066       | 0          |
| ENSG00000269220 | LINC00528  | Chromosome 22: 17,777,322-17,779,481 forward strand   | 2.333       | 0          |
| ENSG00000243836 | WDR86-AS1  | Chromosome 7: 151,409,161-151,413,354 forward strand  | 0.472       | 0          |
| ENSG00000245105 | A2M-AS1    | Chromosome 12: 9,065,177-9,068,060 forward strand     | 0.474       | 0          |
| ENSG00000214851 | LINC00612  | Chromosome 12: 9,055,586-9,065,070 reverse strand     | 0.468       | 0          |

**Supplementary Table 2: Overview of differentially expressed lncRNAs between AMI patients with recurrent events and those without any recurrent events**

| Gene id         | Fold Change | q-value(%) |
|-----------------|-------------|------------|
| LINC01706       | 1.3         | 0          |
| ENSG00000282375 | 1.211       | 0          |
| LOC101928269    | 1.241       | 0          |
| ENSG00000229643 | 1.224       | 0          |
| ENSG00000218537 | 1.255       | 0          |
| ENSG00000225605 | 1.166       | 0          |
| ENSG00000262468 | 1.245       | 0          |
| ENSG00000257660 | 1.205       | 0          |
| ENSG00000235280 | 1.176       | 0          |
| ENSG00000259724 | 1.134       | 0          |
| ENSG00000233760 | 1.16        | 0          |
| ENSG00000235989 | 1.19        | 0          |
| LOC101928140    | 1.205       | 0          |
| ENSG00000280693 | 1.203       | 0          |
| ENSG00000226031 | 1.22        | 0          |
| ENSG00000253643 | 1.125       | 0          |
| ENSG00000272902 | 1.163       | 0          |
| ENSG00000236700 | 1.171       | 0          |
| ENSG00000267270 | 1.106       | 0          |
| ENSG00000250786 | 1.202       | 0          |
| LOC153910       | 1.147       | 0          |
| ENSG00000235621 | 1.186       | 0          |
| ENSG00000273036 | 1.161       | 0          |
| ENSG00000225942 | 1.143       | 0          |
| ENSG00000204934 | 1.181       | 0          |
| ENSG00000181171 | 1.202       | 0          |
| ENSG00000231690 | 1.172       | 0          |
| ENSG00000258399 | 1.157       | 0          |
| ENSG00000233532 | 1.151       | 0          |
| ENSG00000227477 | 1.159       | 0          |
| ENSG00000257726 | 1.171       | 0          |
| ENSG00000226711 | 1.092       | 0          |
| ENSG00000245598 | 1.144       | 0          |
| ENSG00000220891 | 1.127       | 0          |
| ENSG00000281912 | 1.147       | 0          |
| ENSG00000225194 | 1.147       | 0          |
| LOC149684       | 1.103       | 0          |
| ENSG00000232907 | 1.172       | 0          |
| ENSG00000260081 | 1.161       | 0          |
| ENSG00000212855 | 1.163       | 0          |
| ENSG00000212856 | 1.163       | 0          |
| TP73-AS1        | 1.098       | 0          |
| ENSG00000254266 | 1.089       | 0          |
| ENSG00000271858 | 1.151       | 0          |
| ENSG00000237399 | 1.149       | 0          |
| ENSG00000235123 | 1.188       | 0          |
